# Supplementary material for: Endotracheal virome and metatranscriptome of preterm neonates at birth in relation with progression to bronhopulmonary dysplasia
Source: Research Square preprint supplement (doi:10.21203/rs.3.rs-7622573/v1), 2025-10-10

## Extended Data

As data on antibiotic exposure were missing for nearly half of the cohort (15/31), this variable was not included in the initial analyses. However, no obvious differences in endotype distribution related to antibiotic exposure were observed ( $p > 0.05$ ). We also conducted supplementary analyses to specifically assess the impact of prenatal antibiotic therapy on the virome and bacterial composition. No significant differences were found in microbial load (Figure below), diversity, or the abundance of specific microorganisms using ANCOM-BC.

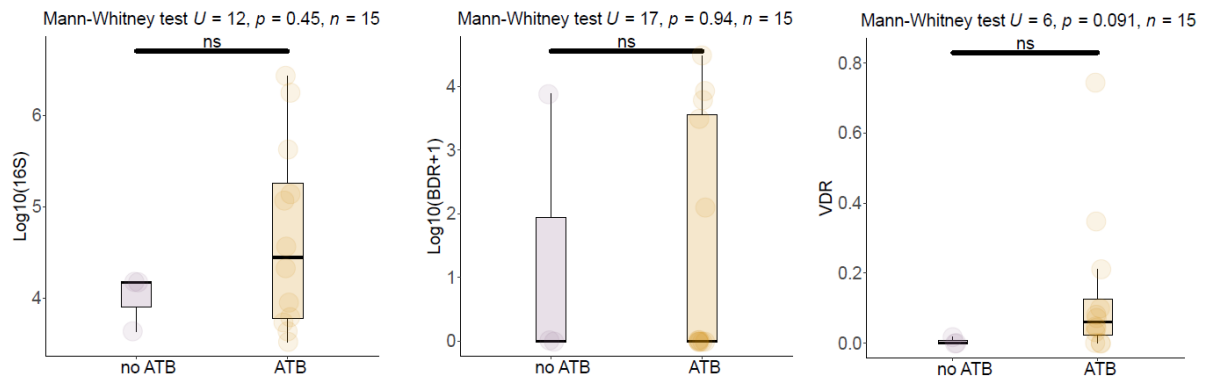

Supplement: Supplementary file 1 [file 003000dff25148054a5215d1.pdf]
